# Supplementary material
Source: publisher figshare collection journal article supplement (https://diabetesjournals.figshare.com/articles/dataset/_/20188583)
Supplement: Supplementary file 1 [file 1]

---

**Supplementary Table 1.** Composition of the two test meals.

---

|                       | <b>MUFA diet</b> | <b>Multifactorial diet</b> |
|-----------------------|------------------|----------------------------|
| Energy (kcal)         | 843              | 821                        |
| Protein (% TEI)       | 18               | 18                         |
| Fat (% TEI)           | 42               | 42                         |
| SFA (% TEI)           | 7                | 7                          |
| MUFA (%TEI)           | 28               | 28                         |
| PUFA n-3 (g)          | 0.36 (0.4%)      | 1.20 (1.31%)               |
| PUFA n-6 (g)          | 2.87 (3.0%)      | 2.91 (3.2%)                |
| Carbohydrates (% TEI) | 40               | 40                         |
| Sugars (% TEI)        | 7.6              | 7.9                        |
| Fiber (g/1000 kcal)   | 7.7              | 14.2                       |
| Glycemic index (%)    | 84               | 39                         |
| Glycemic Load         | 70               | 32                         |
| Vitamin E (mg)        | 8.3              | 8.53                       |
| Vitamin D (µg)        | 1.83             | 2.72                       |
| Vitamin C (mg)        | 33               | 167.5                      |
| Total ORAC (µmolT)    | 1584             | 4441                       |
| Polyphenols (mg)      | 15.6             | 758.3                      |

---

TEI, total energy intake; SFA, saturated fatty acid; MUFA, monounsaturated fatty acid.

---

**Supplementary Table 2.** Baseline characteristics of the participants.

---

|                          | <b>MUFA diet (n=21)</b> | <b>Multifactorial diet (n=18)</b> |
|--------------------------|-------------------------|-----------------------------------|
| Sex (male/female)        | 12/9 (57%/43 %)         | 10/8 (56 %/44%)                   |
| Age (years)              | 64 (5)                  | 64 (6)                            |
| BMI (kg/m <sup>2</sup> ) | 31 (3)                  | 32 (4)                            |
| HbA1c (%)                | 6.5 (0.6)               | 6.5 (0.4)                         |
| HbA1c (mmol/mol)         | 48 (7)                  | 48 (4)                            |
| Diabetes therapy:        |                         |                                   |
| Diet                     | 5 (24%)                 | 5 (28%)                           |
| Glucose lowering drugs   | 16 (76%)                | 13 (72%)                          |

---

Data are n (%) or mean (SD). BMI, body mass index; HbA1c, glycated hemoglobin.
